# Supplementary material for: Spray Deposition of Ag Nanowire–Graphene Oxide Hybrid Electrodes for Flexible Polymer–Dispersed Liquid Crystal Displays
Source: Materials (Basel). 2018 Nov 9;11(11):2231. doi: 10.3390/ma11112231 (PMC6266263; doi:10.3390/ma11112231)
Supplement: Supplementary file 1 [file materials-11-02231-s001.pdf]

## Supplementary Materials

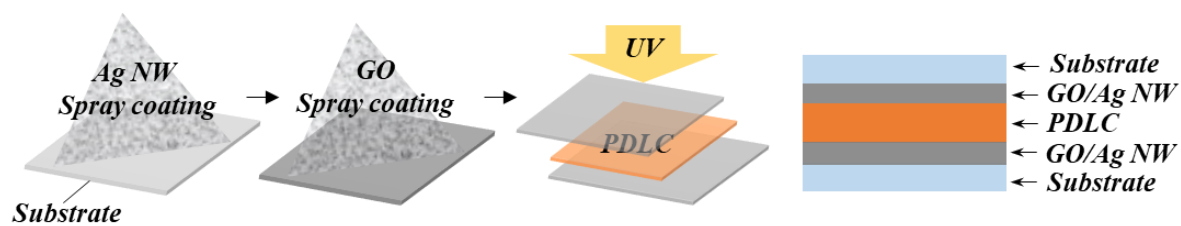

**Figure S1.** Schematic illustration of the steps involved in fabricating PDLC.

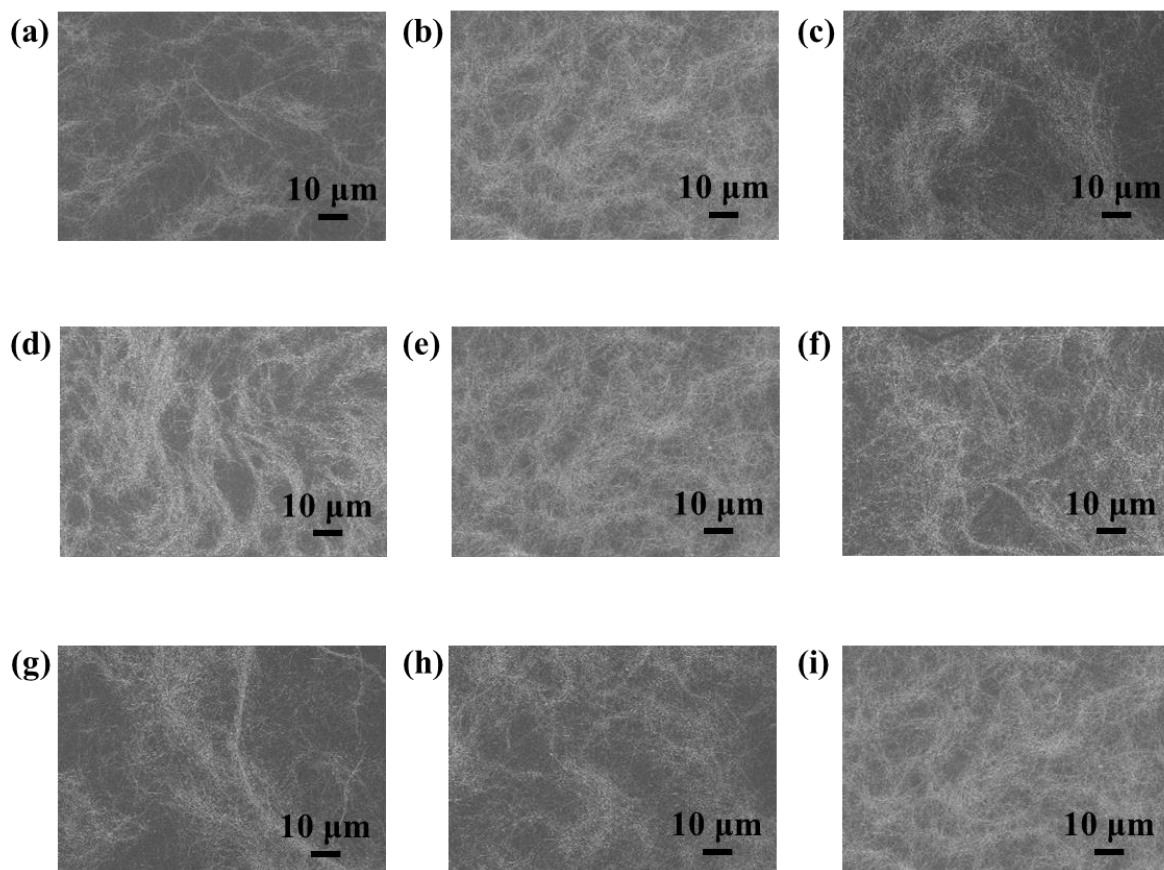

**Figure S2.** SEM images of Ag NW networks obtained with different spray-coating parameters, including dispensing pressures of (a) 0.1, (b) 0.5, and (c) 1 psi, nozzle-to-substrate distances of (d) 3, (e) 6, and (f) 9 cm, and nozzle pressures of (g) 15, (h) 25, and (i) 35 psi.

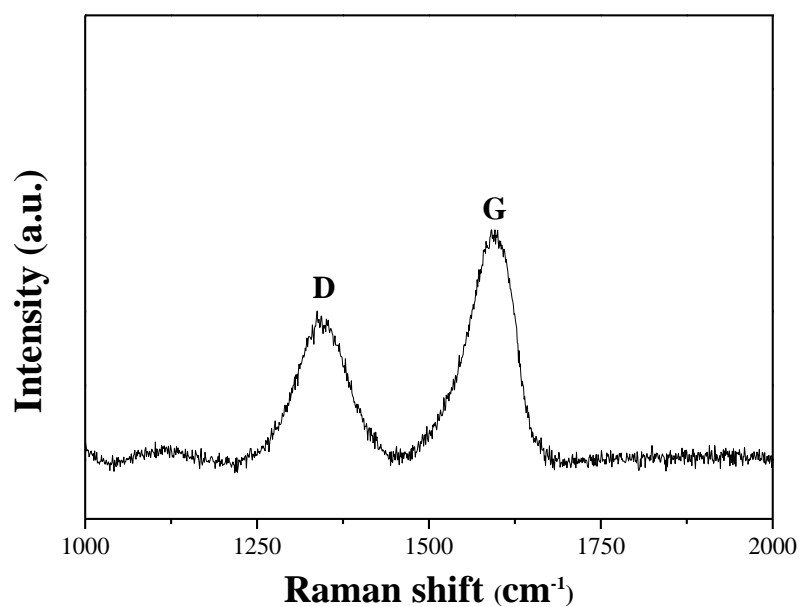

**Figure S3.** The Raman spectra of Ag NW-GO.

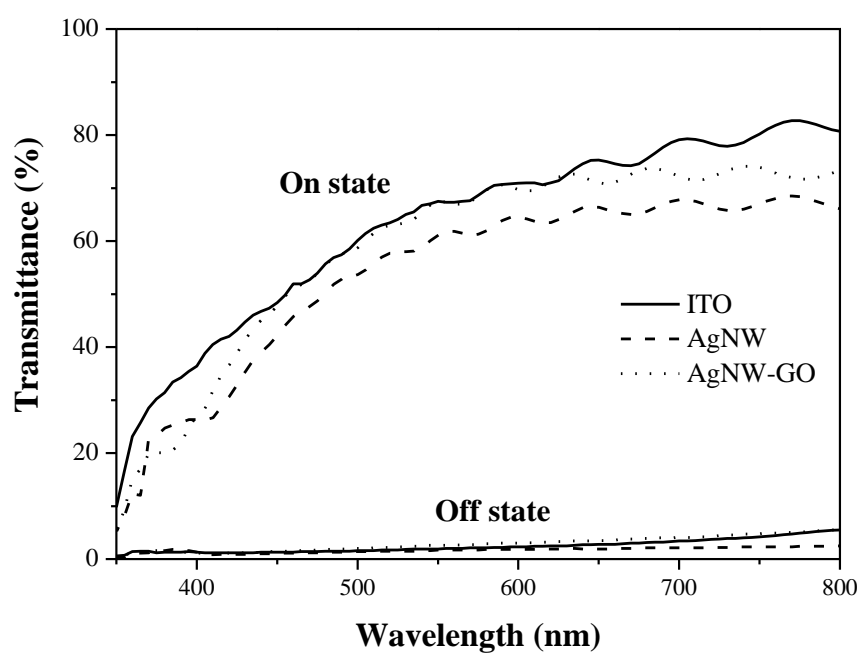

**Figure S4.** Transmittance spectra of the ITO, Ag NW and Ag NW-GO PDLCs in the on-state (80 V) and off-state (0 V).
